# Supplementary material for: Exploring Conditions for Handling Packing and Shipping Aedes aegypti Males to Support an SIT Field Project in Brazil
Source: MDPI journal article supplement (doi:10.3390/insects13100871), 2022-09-25
Supplement: s1 [file s1]

# Statistical Report

## Impact of chilling

This section is dedicated to the first part of the manuscript to define the conditions to initiate the second part of handling, packing, and shipping.

## Survival

The survival models for the temperatures and time intervals for knockout are presented below.

### *Time interval*

Survival analysis of holding mosquitoes at 4 °C for different time intervals.

```
## Call:
## survdiff(formula = Surv(time, status) ~ treatment, data = handling_data2)
##
##               N Observed Expected (O-E)^2/E (O-E)^2/V
## treatment=120   350      89    71.6      4.21     5.65
## treatment=60    350      82    72.5      1.24     1.67
## treatment=90    350      64    74.9      1.59     2.17
## treatment=Control 350      58    73.9      3.43     4.66
##
##  Chisq= 10.6  on 3 degrees of freedom, p= 0.01
```

### *Temperature*

Survival analysis of holding mosquitoes for 60 minutes in different temperatures.

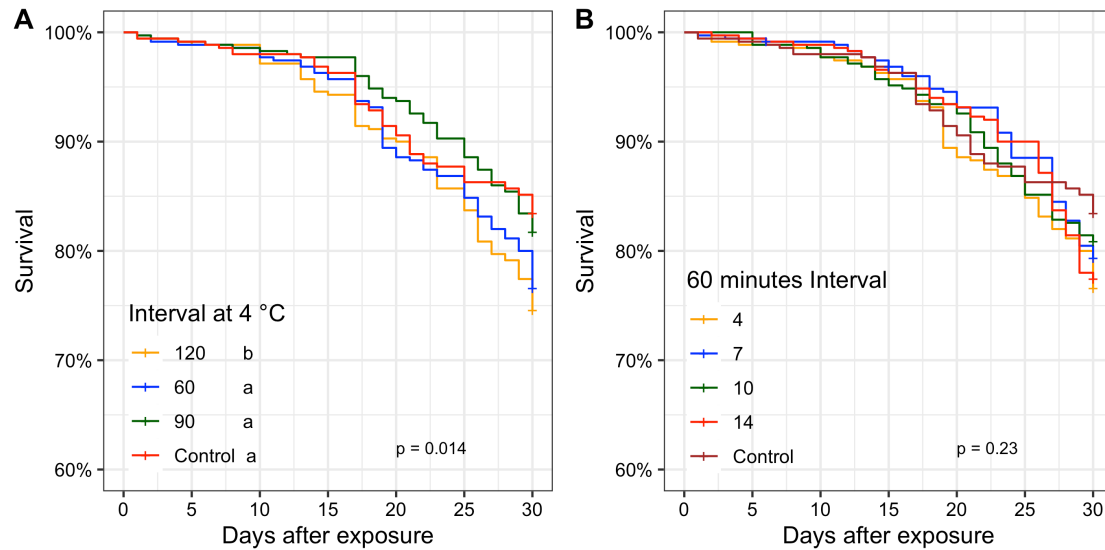

Figure 1. Chilling and time interval survival curve

### Male escaping rate

Escaping rate analysis of males submitted to knockout/chilled conditions at different hours after emergence.

```
## # A tibble: 6 × 4
## # Groups:   compaction_interval, age_at_flight_test [2]
##   compaction_interval age_at_flight_test treatment    mean
##   <ord>              <ord>              <ord>      <dbl>
## 1 6hrs               72hrs               control  0.743
## 2 6hrs               72hrs               100      0.735
## 3 6hrs               72hrs               150      0.776
## 4 24hrs              96hrs               control  0.827
## 5 24hrs              96hrs               100      0.625
## 6 24hrs              96hrs               150      0.757

##
## Kruskal-Wallis rank sum test
##
## data:  escaping_rate by interaction
## Kruskal-Wallis chi-squared = 8.3719, df = 3, p-value = 0.03892
```

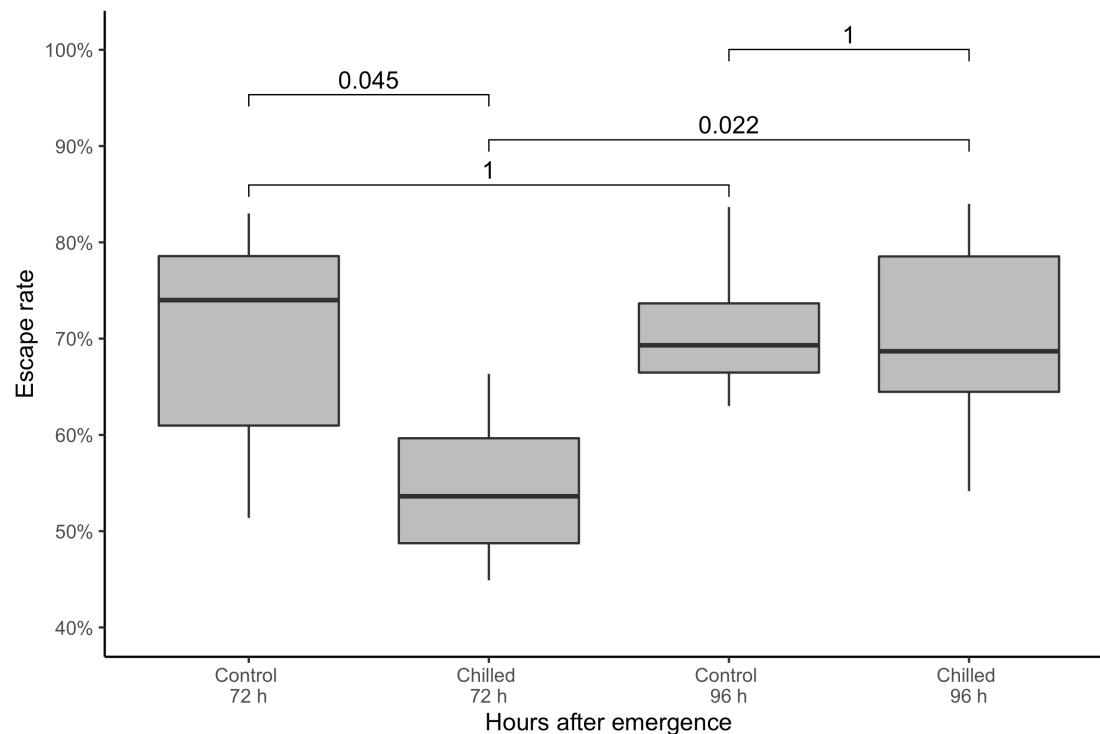

Figure 2. Male escaping rate between males of different ages (72 and 96 h post emergence) during chilled/knockout condition

## Impact of packing and shipping

### Survival

#### Compaction

Survival analysis comparing the two compaction levels at 100 and 150 males/cm<sup>3</sup>.

```
## Call:
## survdiff(formula = Surv(time, status) ~ treatment + transport_time,
##   data = transport_data %>% filter(treatment == "100"))
##
##               N Observed Expected (O-E)^2/E (O-E)^2/V
## treatment=100, transport_time=6  600      209      225      1.18      2.48
## treatment=100, transport_time=24  600      233      217      1.23      2.48
##
##  Chisq= 2.5  on 1 degrees of freedom, p= 0.1

## Call:
## survdiff(formula = Surv(time, status) ~ treatment + transport_time,
##   data = transport_data %>% filter(treatment == "150"))
##
##               N Observed Expected (O-E)^2/E (O-E)^2/V
## treatment=150, transport_time=6  600      244      281      4.78     10.2
## treatment=150, transport_time=24  600      299      262      5.12     10.2
```

```
##
##  Chisq= 10.2  on 1 degrees of freedom, p= 0.001
```

### Transportation time simulation

Survival analysis comparing the two transportation time simulation - 6 and 24 hours.

```
## Call:
## survdiff(formula = Surv(time, status) ~ treatment + transport_time,
##   data = transport_data %>% filter(transport_time %in% c(0,
##   6), treatment != "50"))
##
##
##              N Observed Expected (O-E)^2/E (O-E)
^2/V
## treatment=100, transport_time=6      600      209      160      14.7
19.8
## treatment=150, transport_time=6      600      244      151      57.1
75.6
## treatment=Chilled , transport_time=0  600      114      170      18.5
25.4
## treatment=Control, transport_time=0  600       89      174      41.8
58.1
##
##  Chisq= 135  on 3 degrees of freedom, p= <2e-16

## Call:
## survdiff(formula = Surv(time, status) ~ treatment + transport_time,
##   data = transport_data %>% filter(transport_time %in% c(0,
##   24), treatment != "50"))
##
##
##              N Observed Expected (O-E)^2/E (O-E)
)^2/V
## treatment=100, transport_time=24      600      233      178      17.2
23.1
## treatment=150, transport_time=24      600      299      163     114.2
149.8
## treatment=Chilled , transport_time=0  600      114      195      33.5
46.5
## treatment=Control, transport_time=0  600       89      200      61.4
86.1
##
##  Chisq= 232  on 3 degrees of freedom, p= <2e-16
```

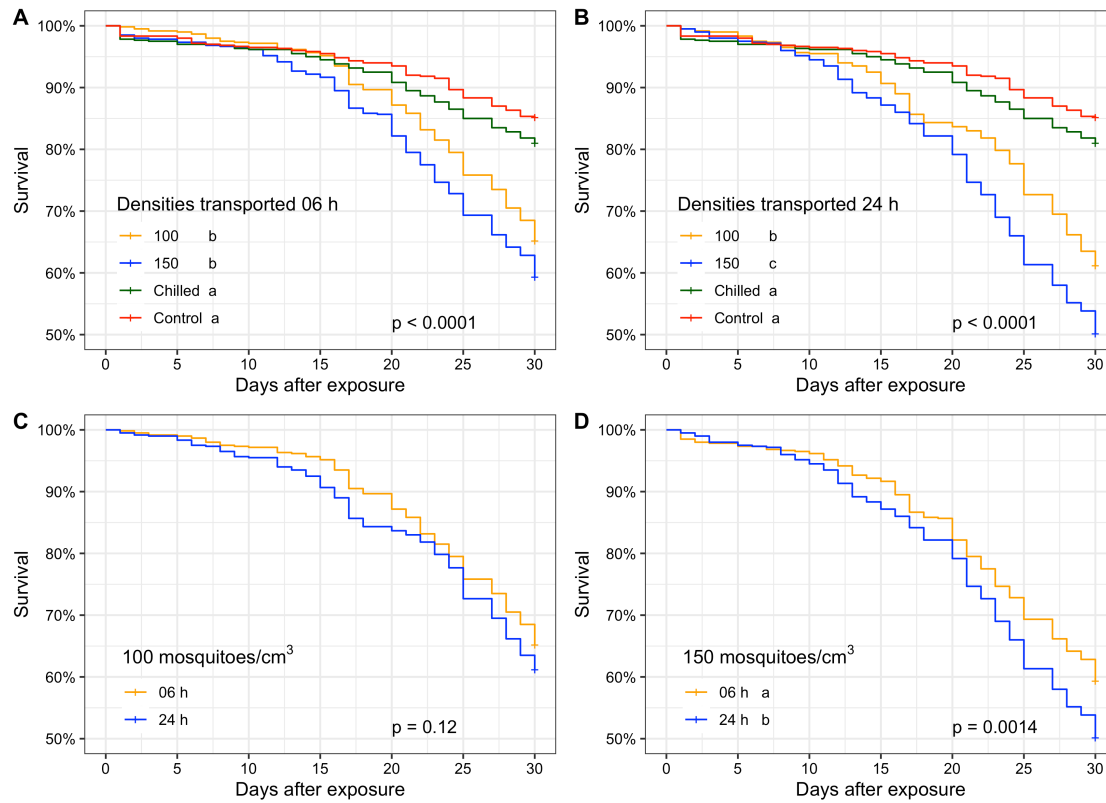

Figure 3. Survival curve for transportation time interval and compaction levels

#### Insemination

```
## # A tibble: 6 × 2
##   interact m_percentage
##   <fct>      <dbl>
## 1 control.6h      0.66
## 2 chilled.6h      0.59
## 3 100.6h          0.58
## 4 150.6h          0.49
## 5 100.24h         0.5
## 6 150.24h         0.4
```

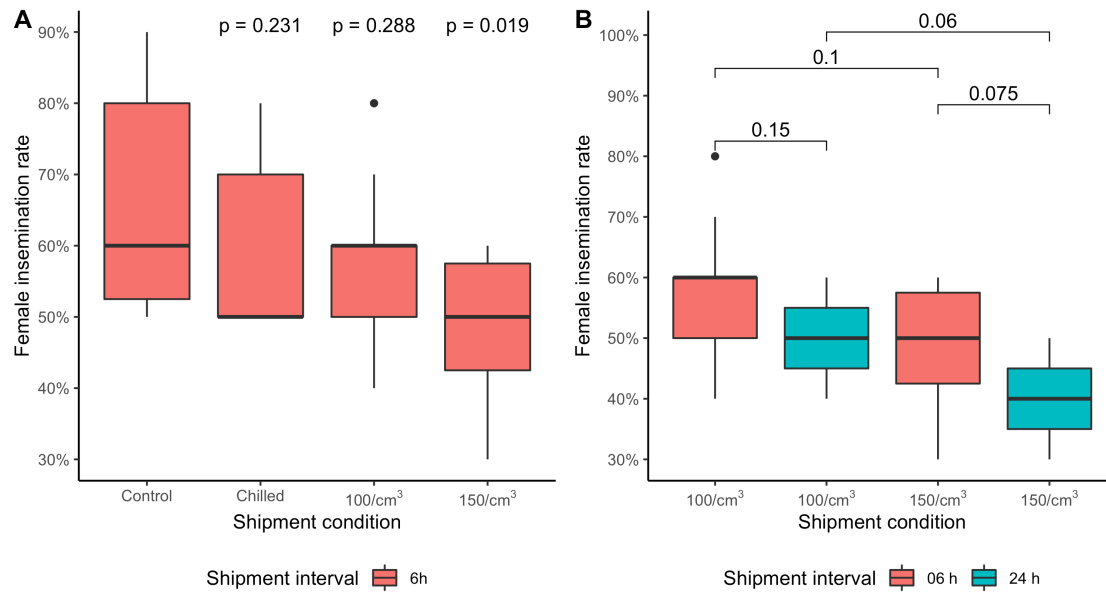

Figure 4. Survival curve for transportation time interval and compaction levels

#### Spermatheca replenishment level

```
##
## Wilcoxon rank sum test with continuity correction
##
## data: p_percent by treatment
## W = 36, p-value = 0.2884
## alternative hypothesis: true location shift is not equal to 0

##
## Wilcoxon rank sum test with continuity correction
##
## data: p_percent by treatment
## W = 19.5, p-value = 0.01856
## alternative hypothesis: true location shift is not equal to 0

##
## Wilcoxon rank sum test with continuity correction
##
## data: p_percent by time
## W = 49.5, p-value = 0.1519
## alternative hypothesis: true location shift is not equal to 0

##
## Wilcoxon rank sum test with continuity correction
##
## data: p_percent by time
## W = 53, p-value = 0.07543
## alternative hypothesis: true location shift is not equal to 0
```

```

##
## Wilcoxon rank sum test with continuity correction
##
## data: p_percent by treatment2
## W = 453.5, p-value = 0.964
## alternative hypothesis: true location shift is not equal to 0

##
## Wilcoxon rank sum test with continuity correction
##
## data: p_percent by treatment2
## W = 209.5, p-value = 0.02086
## alternative hypothesis: true location shift is not equal to 0

##
## Kruskal-Wallis rank sum test
##
## data: p_percent by treatment
## Kruskal-Wallis chi-squared = 7.0029, df = 3, p-value = 0.0718

## # A tibble: 12 x 4
## # Groups:   treatment, time [4]
##   treatment time insemination_status mean
##   <fct>      <ord> <chr>                <int>
## 1 100        6h    full                  10
## 2 100        6h    non-inseminated       10
## 3 100        6h    partial               10
## 4 100       24h    full                   7
## 5 100       24h    non-inseminated       7
## 6 100       24h    partial               7
## 7 150        6h    full                  10
## 8 150        6h    non-inseminated       10
## 9 150        6h    partial               10
## 10 150       24h    full                   7
## 11 150       24h    non-inseminated       7
## 12 150       24h    partial               7

```

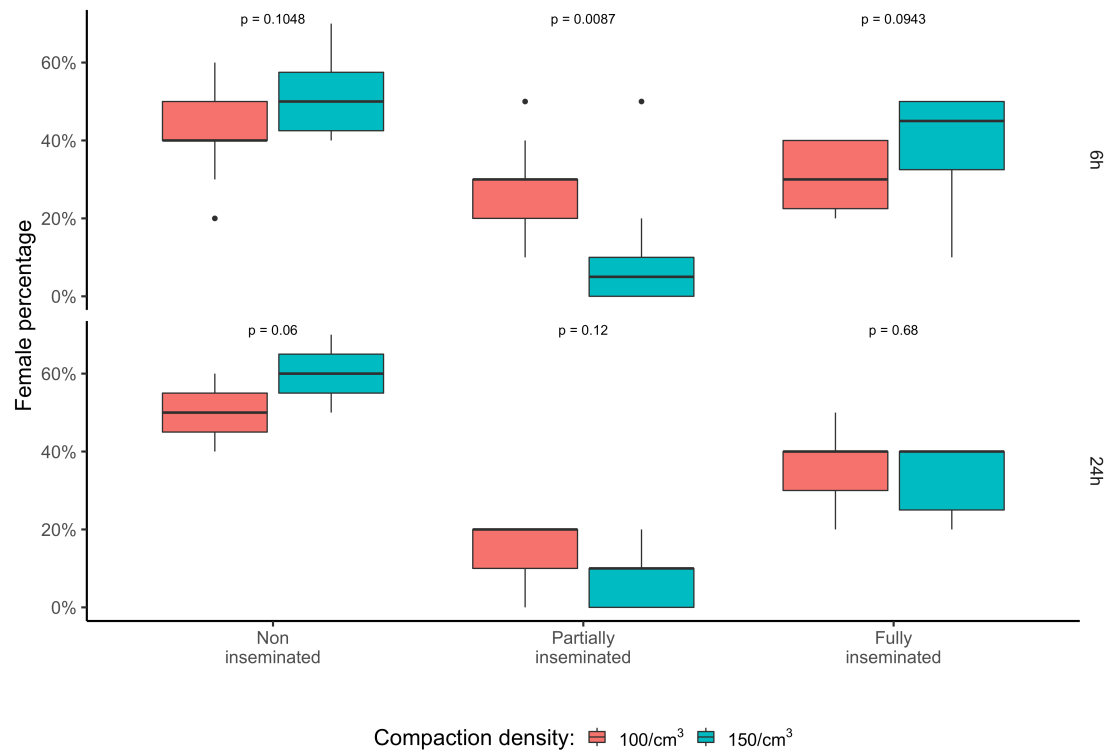

Figure 5. Spermatheca replenishment level of females mated with transported simulated males at different compaction levels

#### Male escaping rate

```
##
## Kruskal-Wallis rank sum test
##
## data:  escaping_rate by interact
## Kruskal-Wallis chi-squared = 1.4152, df = 2, p-value = 0.4928

##
## Kruskal-Wallis rank sum test
##
## data:  escaping_rate by interact
## Kruskal-Wallis chi-squared = 12.292, df = 2, p-value = 0.002142
```



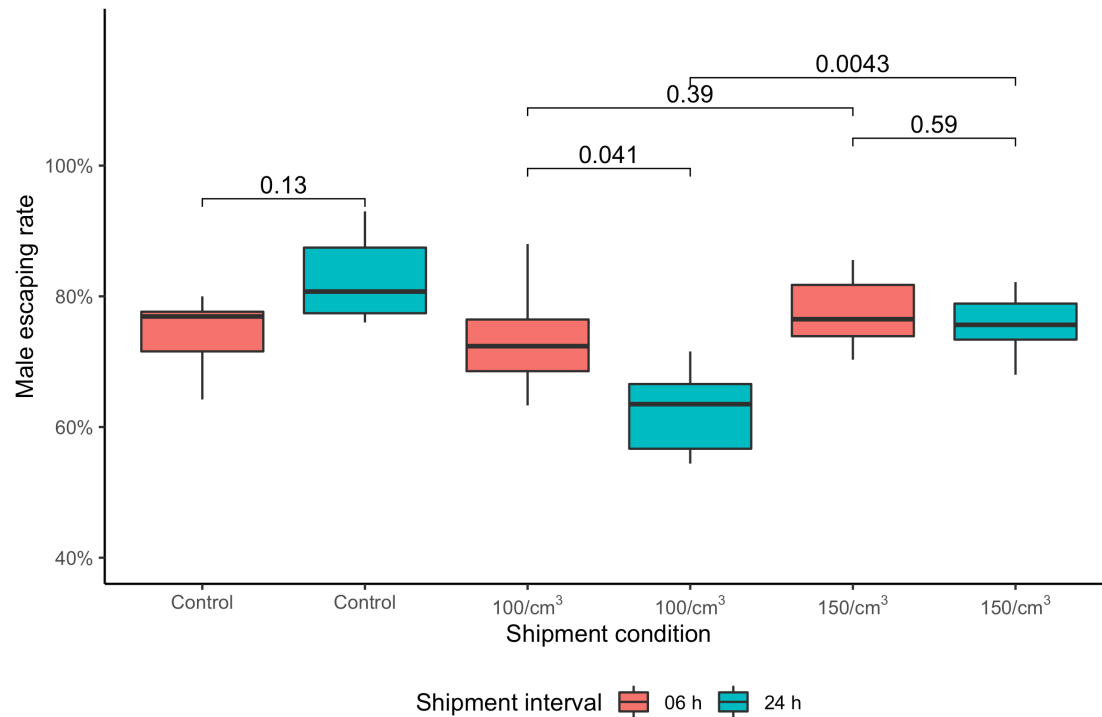

Figure 6. Male escaping rate of different transportation time intervals (6 and 24h) and at different compaction levels

#### Physical damage

```
## # A tibble: 4 × 3
## # Groups:   compaction_interval [2]
##   compaction_interval compaction_rate mean
##   <ord>              <chr>         <dbl>
## 1 6hrs                100/cm3         0.950
## 2 6hrs                150/cm3         0.991
## 3 24hrs               100/cm3         0.933
## 4 24hrs               150/cm3         0.992

##
## Wilcoxon rank sum test with continuity correction
##
## data: percentage by interact
## W = 12.5, p-value = 0.01518
## alternative hypothesis: true location shift is not equal to 0

##
## Wilcoxon rank sum test with continuity correction
##
## data: percentage by interact
## W = 12, p-value = 0.01282
## alternative hypothesis: true location shift is not equal to 0
```

```

##
## Wilcoxon rank sum test with continuity correction
##
## data: percentage by interact
## W = 38.5, p-value = 0.9291
## alternative hypothesis: true location shift is not equal to 0

##
## Wilcoxon rank sum exact test
##
## data: percentage by interact
## W = 35, p-value = 0.6965
## alternative hypothesis: true location shift is not equal to 0

##
## Wilcoxon rank sum exact test
##
## data: percentage by interact
## W = 50, p-value = 0.4082
## alternative hypothesis: true location shift is not equal to 0

##
## Wilcoxon rank sum exact test
##
## data: percentage by interact
## W = 46, p-value = 0.6334
## alternative hypothesis: true location shift is not equal to 0

##
## Wilcoxon rank sum test with continuity correction
##
## data: percentage by interact
## W = 49.5, p-value = 0.4229
## alternative hypothesis: true location shift is not equal to 0

##
## Wilcoxon rank sum test with continuity correction
##
## data: percentage by interact
## W = 38, p-value = 0.8929
## alternative hypothesis: true location shift is not equal to 0

##
## Wilcoxon rank sum test with continuity correction
##
## data: percentage by interact
## W = 10, p-value = 0.008729
## alternative hypothesis: true location shift is not equal to 0

##
## Wilcoxon rank sum test with continuity correction

```

```
##
## data: percentage by interact
## W = 16, p-value = 0.03487
## alternative hypothesis: true location shift is not equal to 0
```

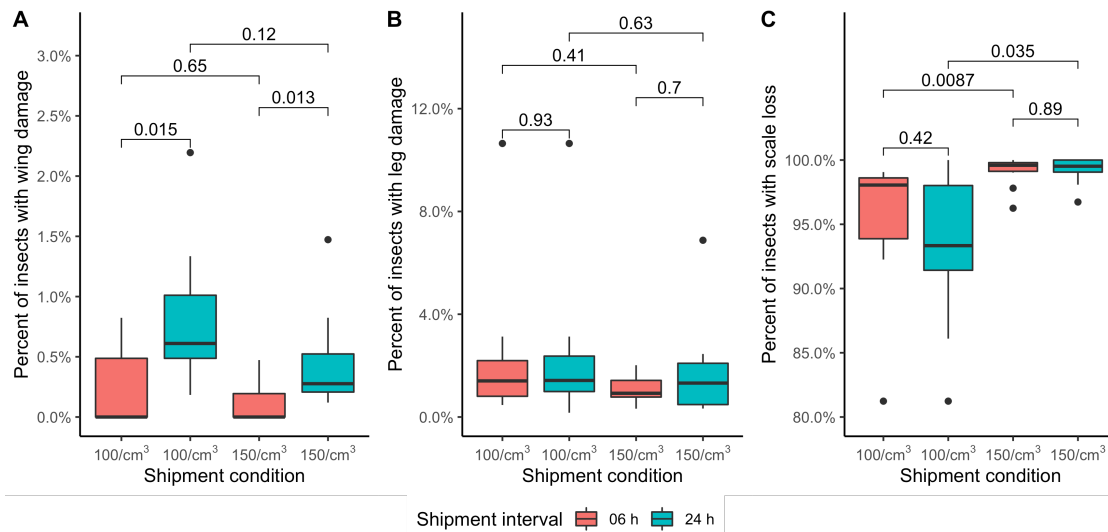

Figure 7. Physical damage analysis considering different body parameters in relation to levels of compaction and transportation time interval.

## Supplementary Material

### Figure S1

```
##          mean      sd
## 1 1.082895 1.21211

## # A tibble: 8 × 4
## # Groups:   treatment [4]
##   treatment time    mean    sd
##   <chr>      <chr> <dbl> <dbl>
## 1 100        24h    0.81 0.393
## 2 100         6h    1.4  0.885
## 3 150        24h    2.28 0.415
## 4 150         6h    2.48 1.06
## 5 chilled   24h     1    1.41
## 6 chilled    6h     1    1.41
## 7 control   24h     0     0
## 8 control    6h     0     0

##
## Kruskal-Wallis rank sum test
##
## data: mortality by interact2
## Kruskal-Wallis chi-squared = 46.239, df = 7, p-value = 7.856e-08
```

```
##
## Kruskal-Wallis rank sum test
##
## data: mortality by interact2
## Kruskal-Wallis chi-squared = 23.299, df = 11, p-value = 0.01604
```

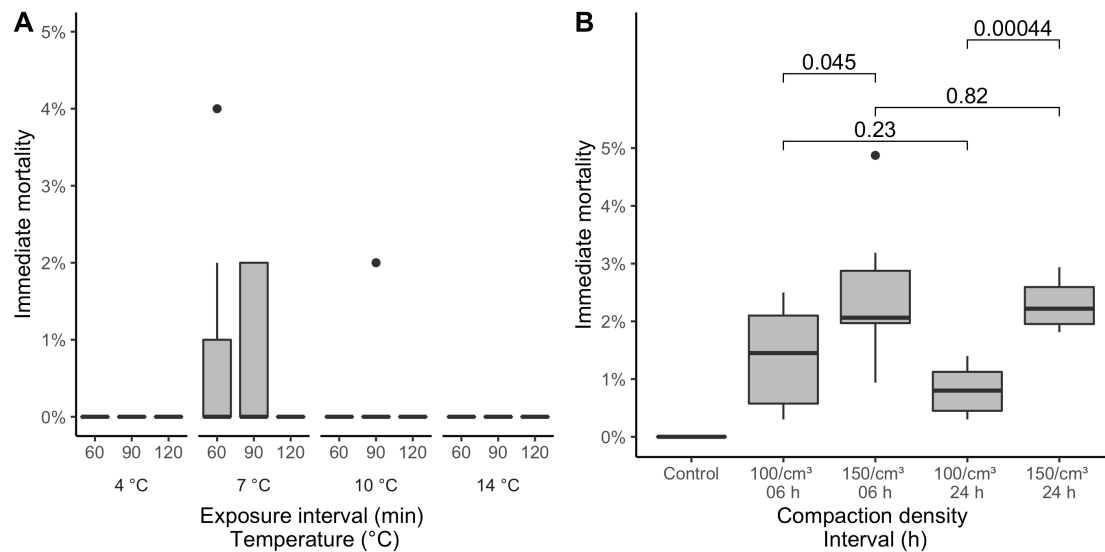

Figure S1. Survival curve for each temperature and time interval that males were submitted

## Figure S2

```
## Call:
## survdiff(formula = Surv(time, status) ~ treatment + temperatura,
## data = handling_data)
##
##
##
```

|                                  | N   | Observed | Expected | (O-E) <sup>2</sup> /E | (O-E) <sup>2</sup> / |
|----------------------------------|-----|----------|----------|-----------------------|----------------------|
| V                                |     |          |          |                       |                      |
| ## treatment=120, temperatura=4  | 350 | 89       | 68.2     | 6.341317              | 6.93787              |
| 8                                |     |          |          |                       |                      |
| ## treatment=120, temperatura=7  | 350 | 76       | 71.2     | 0.324058              | 0.35583              |
| 8                                |     |          |          |                       |                      |
| ## treatment=120, temperatura=10 | 350 | 69       | 69.1     | 0.000169              | 0.00018              |
| 6                                |     |          |          |                       |                      |
| ## treatment=120, temperatura=14 | 350 | 64       | 71.3     | 0.746932              | 0.82033              |
| 3                                |     |          |          |                       |                      |
| ## treatment=60, temperatura=4   | 350 | 82       | 69.1     | 2.411796              | 2.64157              |
| 6                                |     |          |          |                       |                      |
| ## treatment=60, temperatura=7   | 350 | 72       | 70.7     | 0.023395              | 0.02567              |
| 4                                |     |          |          |                       |                      |
| ## treatment=60, temperatura=10  | 350 | 67       | 69.9     | 0.123215              | 0.13509              |
| 2                                |     |          |          |                       |                      |
| ## treatment=60, temperatura=14  | 350 | 79       | 70.5     | 1.012946              | 1.11138              |
| 7                                |     |          |          |                       |                      |
| ## treatment=90, temperatura=4   | 350 | 64       | 71.5     | 0.781165              | 0.85806              |
| 5                                |     |          |          |                       |                      |

```
## treatment=90, temperatura=7      350      66      71.7  0.458437  0.50376
4
## treatment=90, temperatura=10     350      64      70.2  0.548802  0.60194
3
## treatment=90, temperatura=14     350      65      70.9  0.493813  0.54207
3
## treatment=Control, temperatura=4 350      58      70.6  2.240701  2.45880
8
##
## Chisq= 15.7 on 12 degrees of freedom, p= 0.2
```

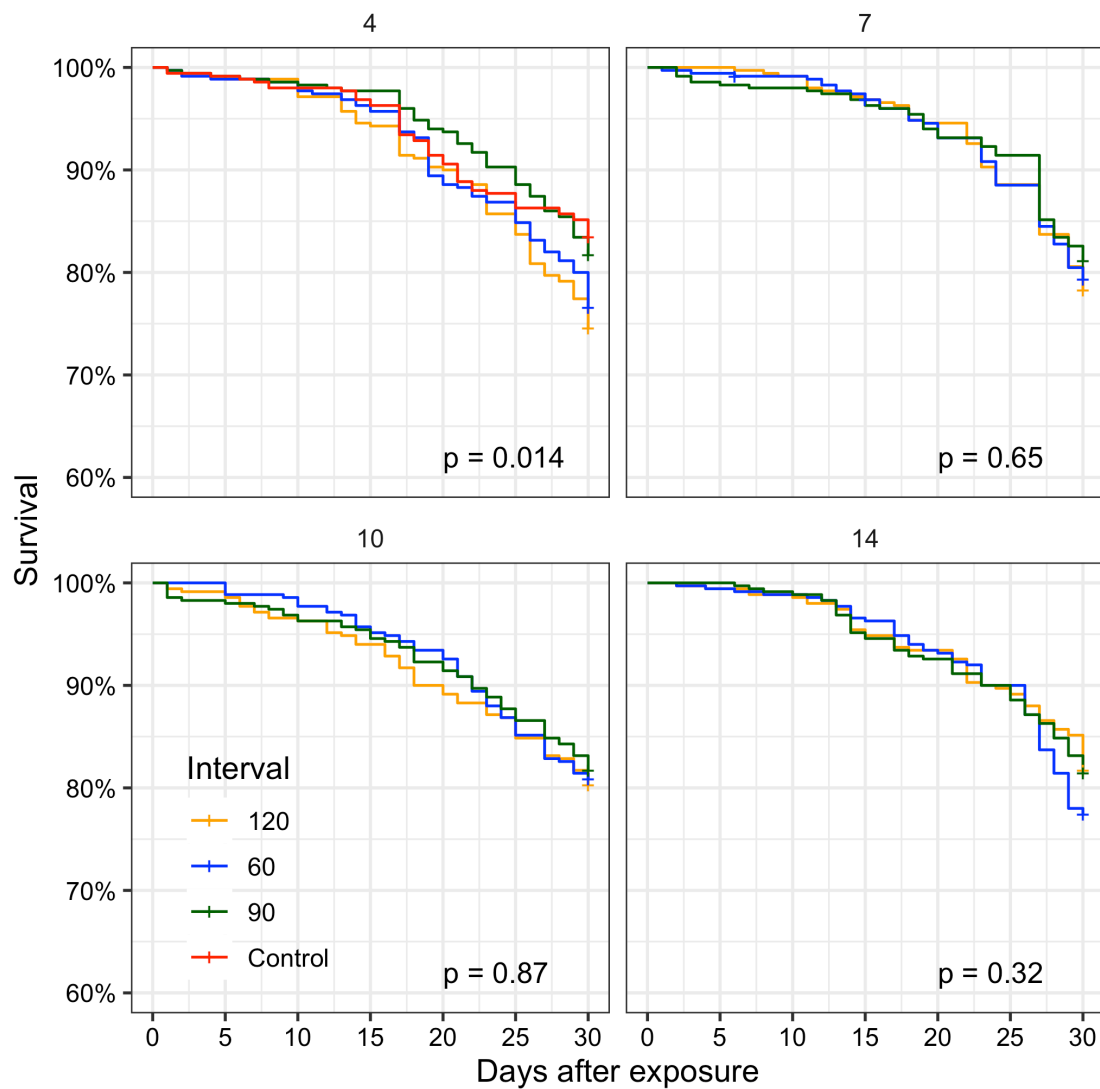

Figure S2. Survival curve for each temperature and time interval that males were submitted

### Session information

```
## R version 4.2.0 (2022-04-22)
## Platform: x86_64-apple-darwin17.0 (64-bit)
```

```

## Running under: macOS Big Sur/Monterey 10.16
##
## Matrix products: default
## BLAS:   /Library/Frameworks/R.framework/Versions/4.2/Resources/lib/libRblas.0.dylib
## LAPACK: /Library/Frameworks/R.framework/Versions/4.2/Resources/lib/libRlapack.dylib
##
## locale:
## [1] en_US.UTF-8/en_US.UTF-8/en_US.UTF-8/C/en_US.UTF-8/en_US.UTF-8
##
## attached base packages:
## [1] stats      graphics  grDevices  utils      datasets  methods   base
##
## other attached packages:
##  [1] multcomp_1.4-19  TH.data_1.1-1    MASS_7.3-56      mvtnorm_1.1-3
##  [5] magrittr_2.0.3   rcompanion_2.4.15 survminer_0.4.9   ggpubr_0.4.0
##  [9] survival_3.3-1   forcats_0.5.1    stringr_1.4.0     dplyr_1.0.9
## [13] purrr_0.3.4      readr_2.1.2      tidyr_1.2.0       tibble_3.1.7
## [17] ggplot2_3.3.6    tidyverse_1.3.1
##
## loaded via a namespace (and not attached):
##  [1] matrixStats_0.62.0 fs_1.5.2          lubridate_1.8.0    httr_1.4.2
##  [5] tools_4.2.0       backports_1.4.1   utf8_1.2.2         R6_2.5.1
##  [9] nortest_1.0-4     DBI_1.1.2         colorspace_2.0-3   withr_2.5.0
## [13] tidyselect_1.1.2  gridExtra_2.3     Exact_3.1          compiler_4.2.0
## [17] cli_3.3.0         rvest_1.0.2       expm_0.999-6       xml2_1.3.3
## [21] sandwich_3.0-1    labeling_0.4.2     scales_1.2.0       lmtest_0.9-40
## [25] survMisc_0.5.6    proxy_0.4-26      multcompView_0.1-8 digest_0.6.29
## [29] rmarkdown_2.14    pkgconfig_2.0.3    htmltools_0.5.2    dbplyr_2.1.1
## [33] fastmap_1.1.0     rlang_1.0.2        readxl_1.4.0       rstudioapi_0.13
## [37] farver_2.1.0      generics_0.1.2     zoo_1.8-9          jsonlite_1.8.0
## [41] car_3.0-12        modeltools_0.2-23  Matrix_1.4-1       Rcpp_1.0.8.3
## [45] DescTools_0.99.45 munsell_0.5.0      fansi_1.0.3        abind_1.4-5
## [49] lifecycle_1.0.1   stringi_1.7.6      yaml_2.3.5         carData_3.0-5
## [53] rootSolve_1.8.2.3 plyr_1.8.7         grid_4.2.0         parallel_4.2.0
## [57] crayon_1.5.1      lmom_2.8           lattice_0.20-45     cowplot_1.1.1
## [61] haven_2.5.0       splines_4.2.0      hms_1.1.1          knitr_1.38
## [65] pillar_1.7.0      boot_1.3-28        gld_2.6.4          ggsignif_0.6.3
## [69] codetools_0.2-18  stats4_4.2.0       reprex_2.0.1       glue_1.6.2
## [73] evaluate_0.15     data.table_1.14.2  modelr_0.1.8       vctrs_0.4.1

```

```
## [77] tzdb_0.3.0      cellranger_1.1.0  gtable_0.3.0      km.ci_0.5-6
## [81] assertthat_0.2.1 xfun_0.30         coin_1.4-2         libcoin_1.0-
9
## [85] xtable_1.8-4     broom_0.8.0       e1071_1.7-9       rstatix_0.7.
0
## [89] class_7.3-20     KMSurv_0.1-5      ellipsis_0.3.2
```
