# Supplementary figures and images for: Exploring Conditions for Handling Packing and Shipping Aedes aegypti Males to Support an SIT Field Project in Brazil
Source: MDPI journal article supplement (doi:10.3390/insects13100871), 2022-09-25

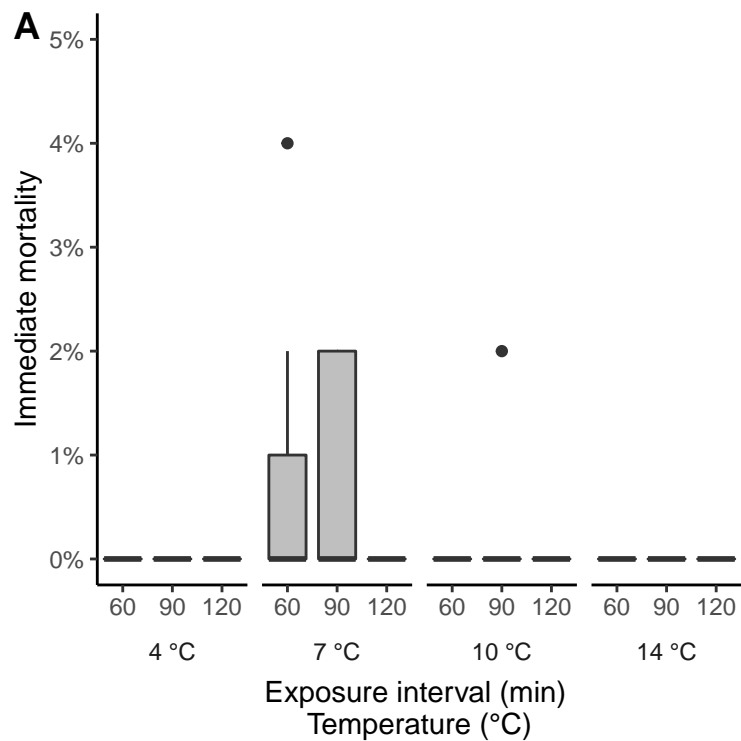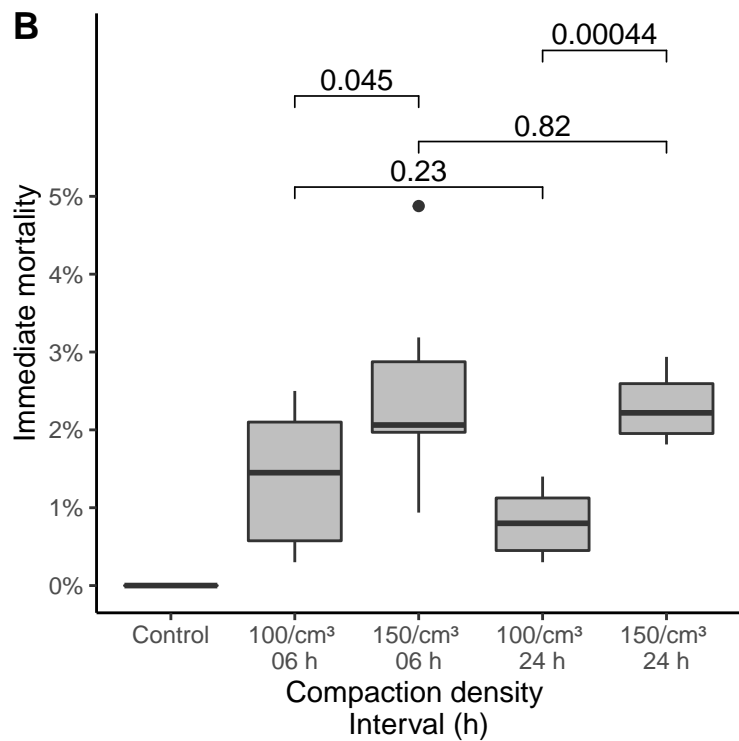

Supplement: s1 [file s1]

4

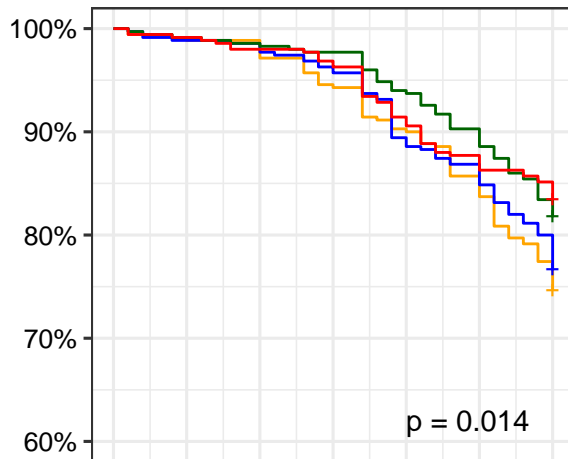

7

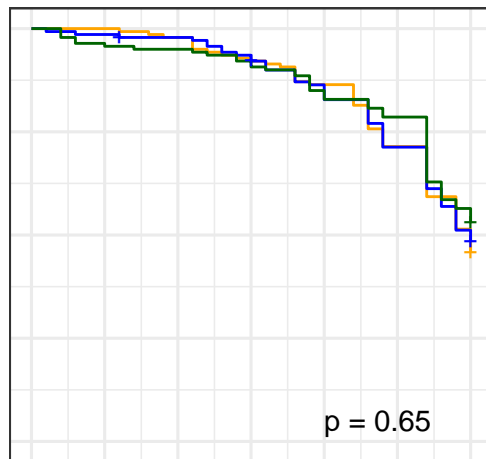

10

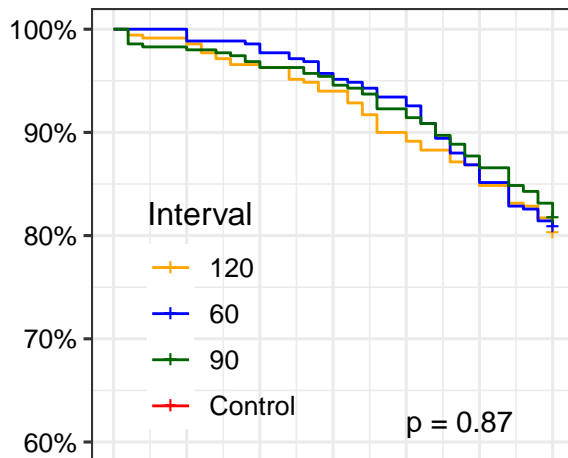

14

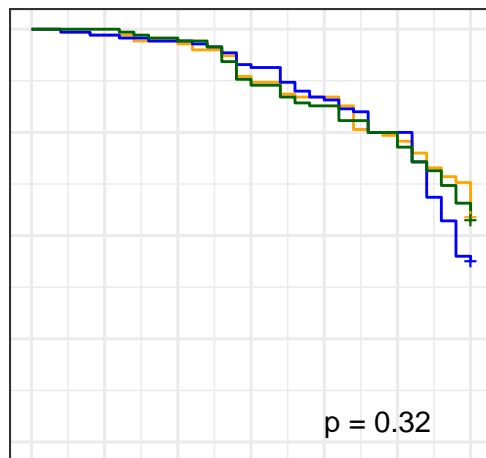

Days after exposure

Supplement: s1 [file s1]
